# Supplementary material for: Prevalence and risk factors for HIV, hepatitis B, and hepatitis C in people with severe mental illness: a total population study of Sweden
Source: PubMed Central journal article supplement — Lancet Psychiatry. 2017 Sep;4(9):685–93. doi: 10.1016/S2215-0366(17)30253-5 (PMC5573766; doi:10.1016/s2215-0366(17)30253-5), 2017-09
Supplement: mmc1.pdf [file mmc1.pdf]

# THE LANCET Psychiatry

## Supplementary appendix

This appendix formed part of the original submission and has been peer reviewed. We post it as supplied by the authors.

Supplement to: Bauer-Staeb C, Jørgensen L, Lewis G, Dalman C, Osborn DPJ, Hayes JF. Prevalence and risk factors for HIV, hepatitis B, and hepatitis C in people with severe mental illness: a total population study of Sweden. *Lancet Psychiatry* 2017; published online July 4. [http://dx.doi.org/10.1016/S2215-0366\(17\)30253-5](http://dx.doi.org/10.1016/S2215-0366(17)30253-5).

**Web appendix for:**

**Prevalence and risk factors for HIV, hepatitis B, and hepatitis C in people with severe mental illness: a total population study of Sweden**

**Contents:**

1. International Classification of Diseases codes

## International Classification of Diseases codes

### Severe mental illness

The exposure was SMI status, which included a clinical diagnosis of schizophrenia (The International Statistical Classification of Diseases and Related Health Problems [ICD]-10 code F20n; ICD-9 code 295A-E, G, W, X; ICD-8 code 295,00-40, 60, 80 99), schizoaffective disorder (ICD-10 code F25n; ICD-9 code 295H; ICD-8 295,70), bipolar disorder (ICD-10 code F30-F31n; ICD-9 code 296A, C-E, W, X; ICD-8 code 296,10-30, 88, 99), and other non-organic psychotic illnesses (ICD-10 code F21-F24n, F28-F29n; ICD-9 code 297, 298B-E, W, X; ICD-8 code 297, 298,10-99, 299,99).<sup>1-3</sup>

### Blood-borne viruses

The outcome was BBV status, which included having a diagnosis of HIV (ICD-10 code B20-B24n, Z21n; ICD-9 code 279K, 079J, V02J9, HBV (ICD-10 code B16n, B180, B181; ICD-9 code 070C-D), or HCV (ICD-10 code B171, B182; ICD-9 code 070F, 070X).<sup>1-3</sup> All individuals, who had never contracted a HIV, HBV, or HCV (as specified above), were classified as not having a BBV. BBV status was identified via linkage to the National Patient Record and the Register for Infection Disease Control.

### Substance misuse

A history of substance misuse was specified as having a clinical diagnosis of substance misuse (ICD-10 code F10-F16n; F18-F19n; T40n; ICD-9 code 303-305; ICD-8 code 303-304),<sup>1-3</sup> or being on opiate replacement therapy (Anatomical Therapeutic Chemical Classification System code N07BCn).

## References

1. World Health Organization. Swedish Version of the International Statistical Classification of Diseases and Related Health Problems, 8<sup>th</sup> Revision. 1967. <https://www.socialstyrelsen.se/klassificeringochkoder/Documents/KS68.pdf> (accessed 09 April, 2017).
2. World Health Organization. Swedish Version of the International Statistical Classification of Diseases and Related Health Problems, 9<sup>th</sup> Revision. 1987. <https://www.socialstyrelsen.se/klassificeringochkoder/Documents/KLASS87.pdf> (accessed 09 April, 2017).
3. World Health Organization. International Statistical Classification of Diseases and Related Health Problems, 10<sup>th</sup> Revision. Geneva: World Health Organization, 1992.
4. WHO Collaborating Centre for Drug Statistics Methodology Norwegian Institute of Public Health. ATC/DDD Index 2016. 2015. [http://www.whocc.no/atc\\_ddd\\_index](http://www.whocc.no/atc_ddd_index) (accessed 09 April, 2017).
